# Supplementary material for: High-Efficiency and Narrowband Green Thermally Activated Delayed Fluorescence Organic Light-Emitting Diodes Based on Two Diverse Boron Multi-Resonant Skeletons
Source: MDPI journal article supplement (doi:10.3390/molecules29040841), 2024-02-14
Supplement: s1 [file s1]

# Supporting Information

## High-efficiency and narrowband green thermally activated de-layed fluorescence organic light-emitting diodes based on two diverse boron multi-resonant skeletons

Zhen Wang<sup>1</sup>, Cheng Qu<sup>1</sup>, Jie Liang<sup>2</sup>, Xuming Zhuang<sup>2</sup>, Yu Liu<sup>1,\*</sup> and Yue Wang<sup>1</sup>

1 State Key Laboratory of Supramolecular Structure and Materials, College of Chemistry, Jilin University, Changchun 130012, P. R. China

2 Jihua Laboratory, 28 Huandao South Road, Foshan, 528200, Guangdong Province, P. R. China

\* Correspondence: [yuliu@jlu.edu.cn](mailto:yuliu@jlu.edu.cn) (Y.L.)

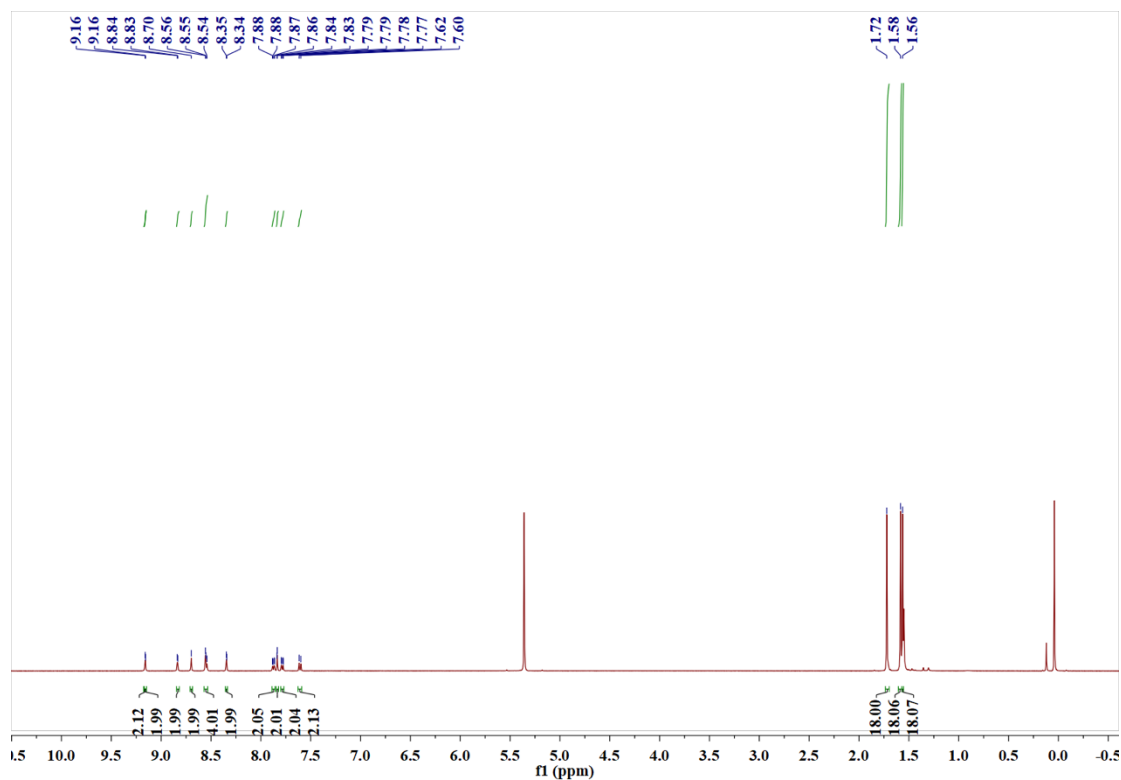

**Figure S1.** <sup>1</sup>H NMR spectrum BNBO (500 MHz, Methylene Chloride-*d*<sub>2</sub>)

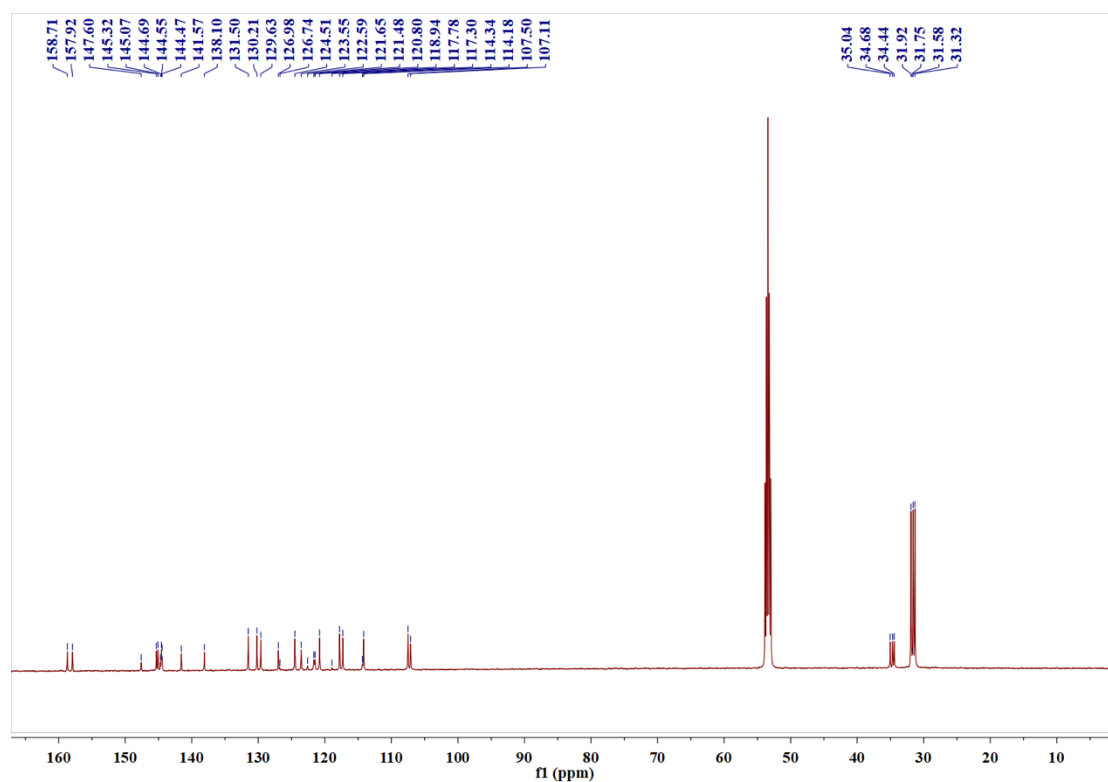

**Figure S2.**  $^{13}\text{C}$  NMR spectrum BNBO (500 MHz, Methylene Chloride- $d_2$ )

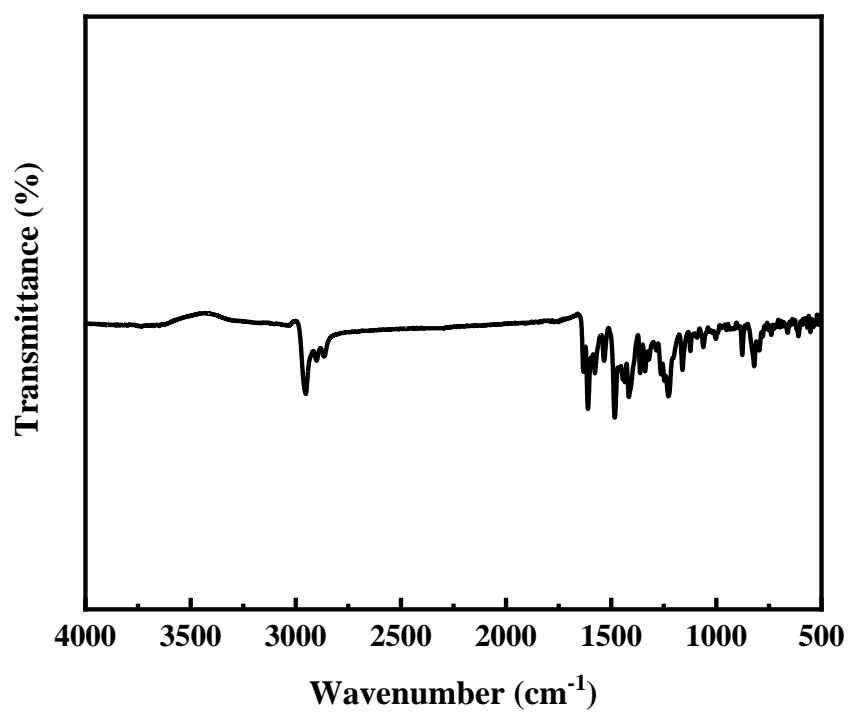

**Figure S3.** Infrared spectrum of BNBO

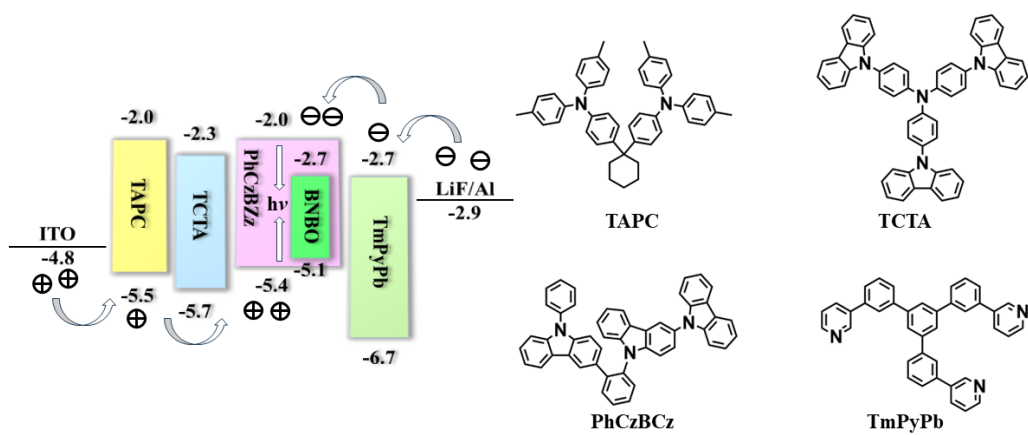

**Figure S4.** Molecular structure, energy level structure and schematic diagram of electroluminescence mechanism for device
